# Supplementary material for: Projecting the Potential Distribution Areas of Ixodes scapularis (Acari: Ixodidae) Driven by Climate Change
Source: MDPI journal article supplement (doi:10.3390/biology11010107), 2022-01-10
Supplement: s1 [file s1]

**Table S1.** Climate variables used in projecting the potential geographic distribution of *I. scapularis*.

| Code      | Climate Variables                                          |
|-----------|------------------------------------------------------------|
| Bio1      | Annual Mean Temperature                                    |
| Bio2      | Mean Diurnal Range (Mean of monthly (max temp – min temp)) |
| Bio3      | Isothermality (Bio2/Bio7) (*100)                           |
| Bio4      | Temperature Seasonality (standard deviation*100)           |
| Bio5      | Max Temperature of Warmest Month                           |
| Bio6      | Min Temperature of Coldest Month                           |
| Bio7      | Temperature Annual Range (Bio5 – Bio6)                     |
| Bio8      | Mean Temperature of Wettest Quarter                        |
| Bio9      | Mean Temperature of Driest Quarter                         |
| Bio10     | Mean Temperature of Warmest Quarter                        |
| Bio11     | Mean Temperature of Coldest Quarter                        |
| Bio12     | Annual Precipitation                                       |
| Bio13     | Precipitation of Wettest Month                             |
| Bio14     | Precipitation of Driest Month                              |
| Bio15     | Precipitation Seasonality (Coefficient of Variation)       |
| Bio16     | Precipitation of Wettest Quarter                           |
| Bio17     | Precipitation of Driest Quarter                            |
| Bio18     | Precipitation of Warmest Quarter                           |
| Bio19     | Precipitation of Coldest Quarter                           |
| Tmin1-12  | Monthly Average Minimum Temperature                        |
| Tmax1-12  | Monthly Average Maximum Temperature                        |
| Prec1-12  | Monthly Total Precipitation                                |
| Elevation | Elevation data                                             |
